# Supplementary material for: Asymmetric molecular modification of viologens for highly stable electrochromic devices
Source: Royal Society of Chemistry journal article supplement (doi:10.1039/c9ra09007j), 2020-01-01
Supplement: c9ra09007j1.pdf [file c9ra09007j1.pdf]

## **Electronic Supporting Information**

# **Asymmetric molecular modification of viologens for highly stable electrochromic devices**

Mark Kim, Yong Min Kim, and Hong Chul Moon\*

Department of Chemical Engineering, University of Seoul, Seoul 02504, Republic of Korea

\*Corresponding author: [hcmoon@uos.ac.kr](mailto:hcmoon@uos.ac.kr) (H. C. M)

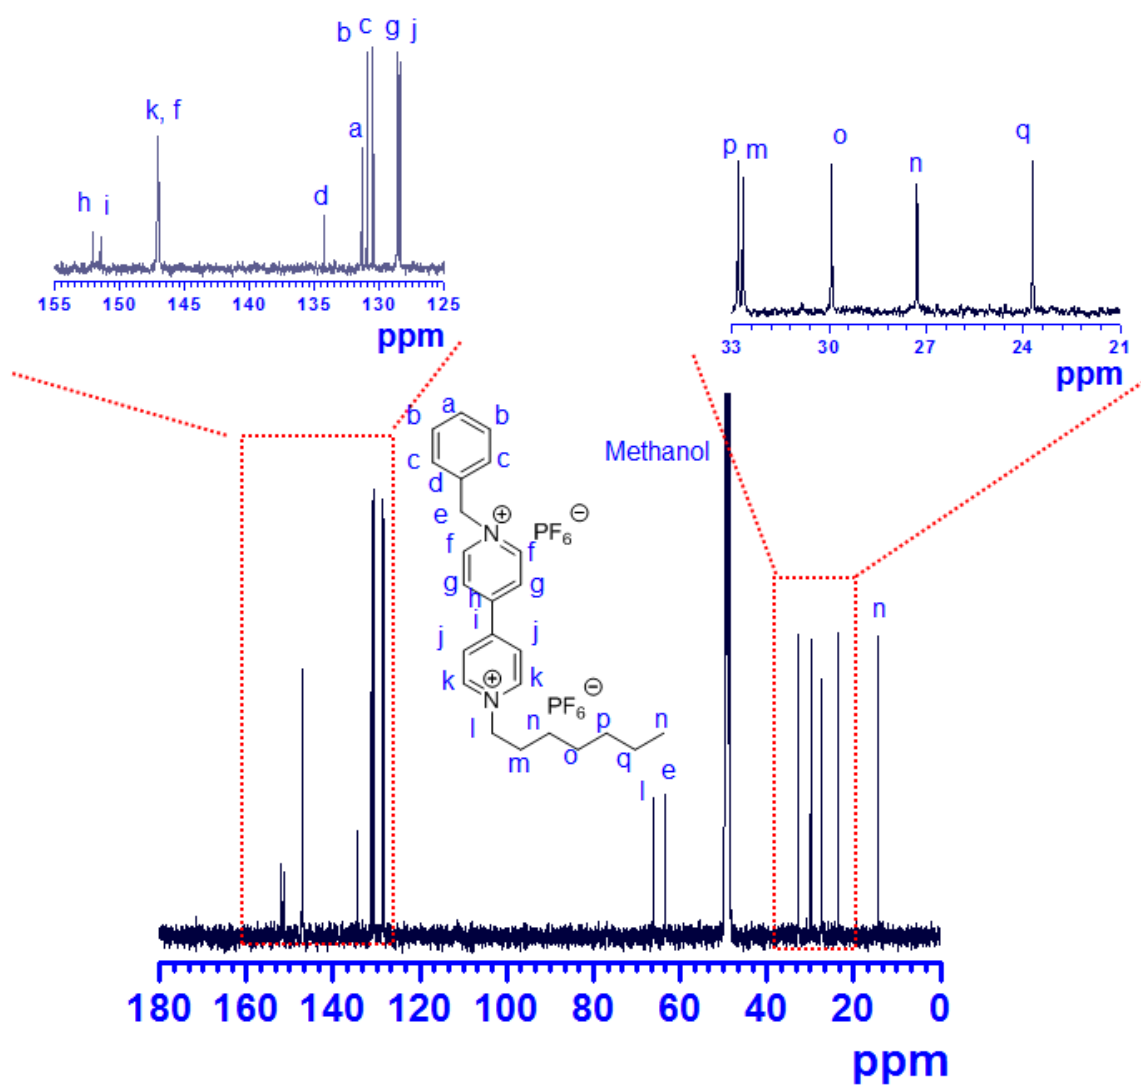

**Fig. S1**  $^{13}\text{C}$  NMR spectrum of  $\text{BHV}(\text{PF}_6)_2$ , supporting successful synthesis of  $\text{BHV}^{2+}$ .

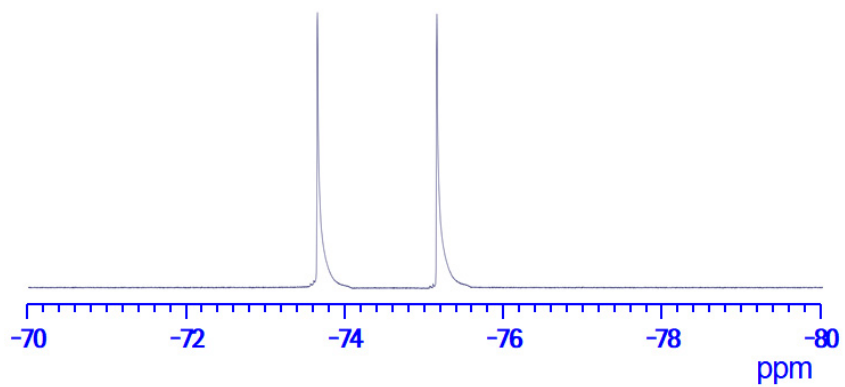

**Fig. S2.**  $^{19}\text{F}$  NMR spectrum of  $\text{BHV}(\text{PF}_6)_2$ , indicating successful anion exchange reaction to involve hexafluorophosphates.

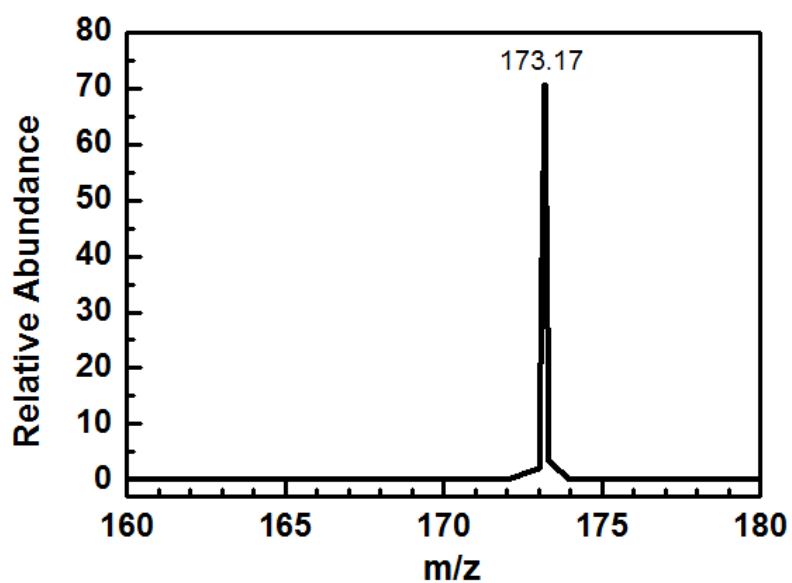

**Fig. S3.** Electrospray ionization mass spectroscopy (ESI-MS) spectrum of  $\text{BHV}^{2+}$ . Considering  $z = 2$  for  $\text{BHV}^{2+}$ ,  $m$  value is found to be 346.34 (calculated for 346.51).

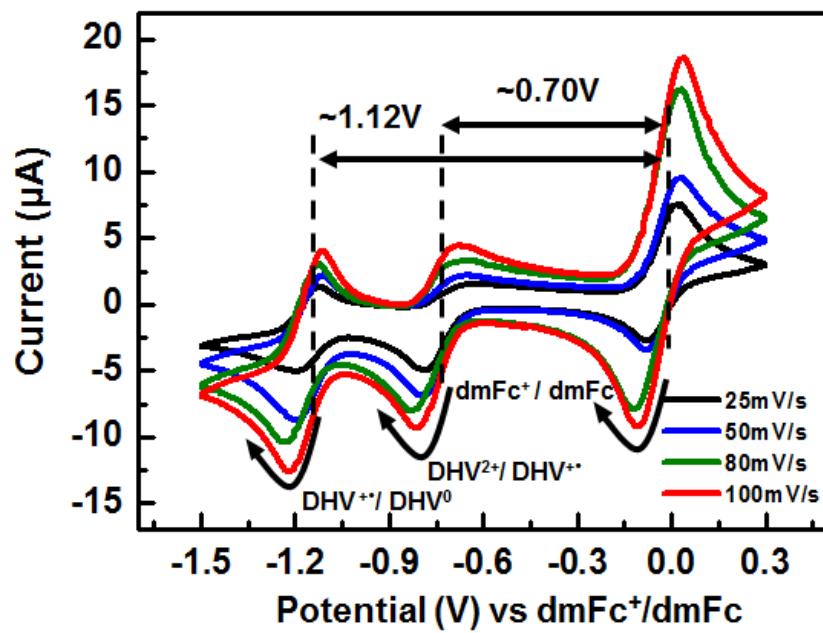

**Fig. S4.** Cyclic voltammograms of DHV<sup>2+</sup>-containing EC system with [BMI][BF<sub>4</sub>].
